# Supplementary material
Source: PubMed Central journal article supplement (PMC4201139)
Supplement: supp_mol.114.092544_Supplemental_Data_92544.pdf [file supp_mol.114.092544_Supplemental_Data_92544.pdf]

**Supplemental Data**

**Molecular Pharmacology**

**MOL Manuscript 92544**

**Reversible epigenetic regulation of 14-3-3 $\sigma$  expression in acquired gemcitabine resistance  
by Uhrf1 and DNMT1**

Li Qin, Zizheng Dong, and Jian-Ting Zhang

Supplemental Figure S1

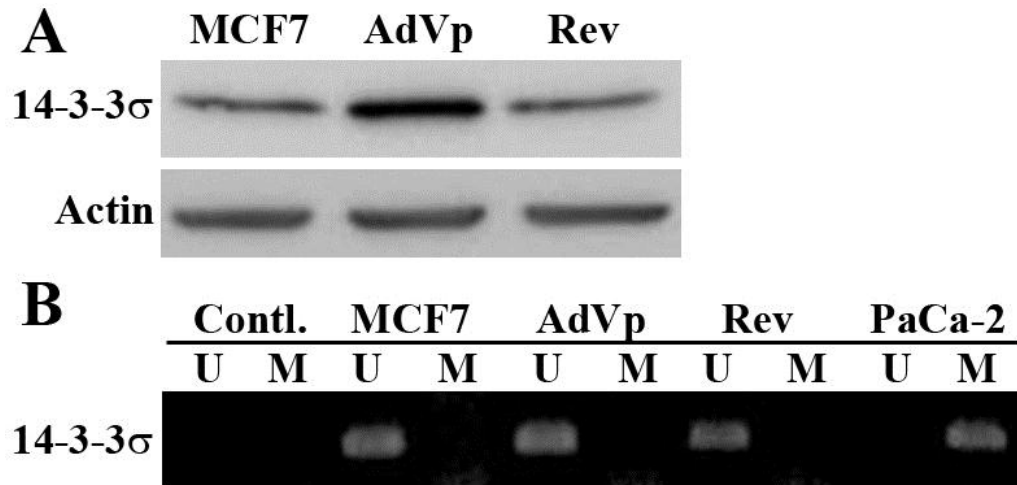

**Supplemental Figure S1. 14-3-3 $\sigma$  up-regulation in Adriamycin-selected MCF7/AdVp3000 cells is not due to gene demethylation.** (A). Western blot analysis of 14-3-3 $\sigma$  expression in MCF7, MCF7/Advp3000 (AdVp), and MCF7/AdVp/Rev (Rev) cells. Actin was used as a loading control. (B). MSP analysis of 14-3-3 $\sigma$  gene in MCF7, MCF7/Advp3000 (AdVp), and MCF7/AdVp/Rev (Rev) cells with MiaPaC-2 cells as a control. U, primers for unmethylated; M, primers for methylated. Contl., control MSP without genomic DNA input.

**Supplemental Figure S2**

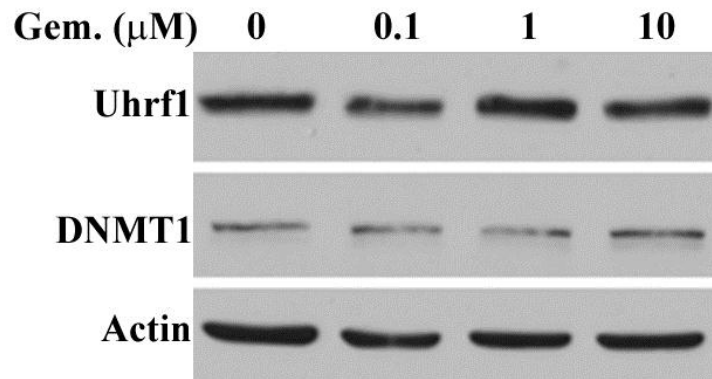

**Supplemental Figure S2. Effect of gemcitabine treatment on Uhrf1 and DNMT1 expression.** MiaPaCa-2 cells were treated with increasing concentrations of gemcitabine followed by Western blot analysis of Uhrf1, DNMT1, and actin loading control.
